# Supplementary material for: MicroRNA Expression in Extracellular Vesicles from Nasal Lavage Fluid in Chronic Rhinosinusitis
Source: MDPI journal article supplement (doi:10.3390/biomedicines9050471), 2021-04-26
Supplement: s1 [file s1]

## Supplementary

**Table S1.** Demographics of CRS patients and healthy subjects.

|                   | <b>CRSwNP</b><br>( <i>N</i> = 44) | <b>CRSsNP</b><br>( <i>N</i> = 108) | <b>HC</b><br>( <i>N</i> = 77) |
|-------------------|-----------------------------------|------------------------------------|-------------------------------|
| Sex, male (%)     | 27 (61.36%)                       | 75 (69.44%)                        | 47 (61.04%)                   |
| Age, year         | 45 (2.6)                          | 44 (1.8)                           | 37 (2.4)                      |
| JESREC score      | 10 (0.7)                          | 6 (0.4)                            | 1 (0.7)                       |
| <b>Eosinophil</b> |                                   |                                    |                               |
| non-ECRS          | 25 (55.56%)                       | 86 (86.00%)                        | 11 (100.00%)                  |
| mild ECRS         | 12 (26.67%)                       | 10 (10.00%)                        | 0 (.00%)                      |
| moderate ECRS     | 4 (8.89%)                         | 1 (1.00%)                          | 0 (.00%)                      |
| severe ECRS       | 4 (8.89%)                         | 3 (3.00%)                          | 0 (.00%)                      |
| <b>Allergy</b>    |                                   |                                    |                               |
| (+)               | 11 (25.58%)                       | 44 (41.90%)                        | 6 (7.79%)                     |
| (-)               | 32 (74.42%)                       | 61 (58.10%)                        | 71 (92.21%)                   |
| <b>Asthma</b>     |                                   |                                    |                               |
| (+)               | 5 (11.11%)                        | 4 (3.74%)                          | 2 (2.60%)                     |
| (-)               | 40 (88.89%)                       | 103 (96.26%)                       | 75 (97.40%)                   |

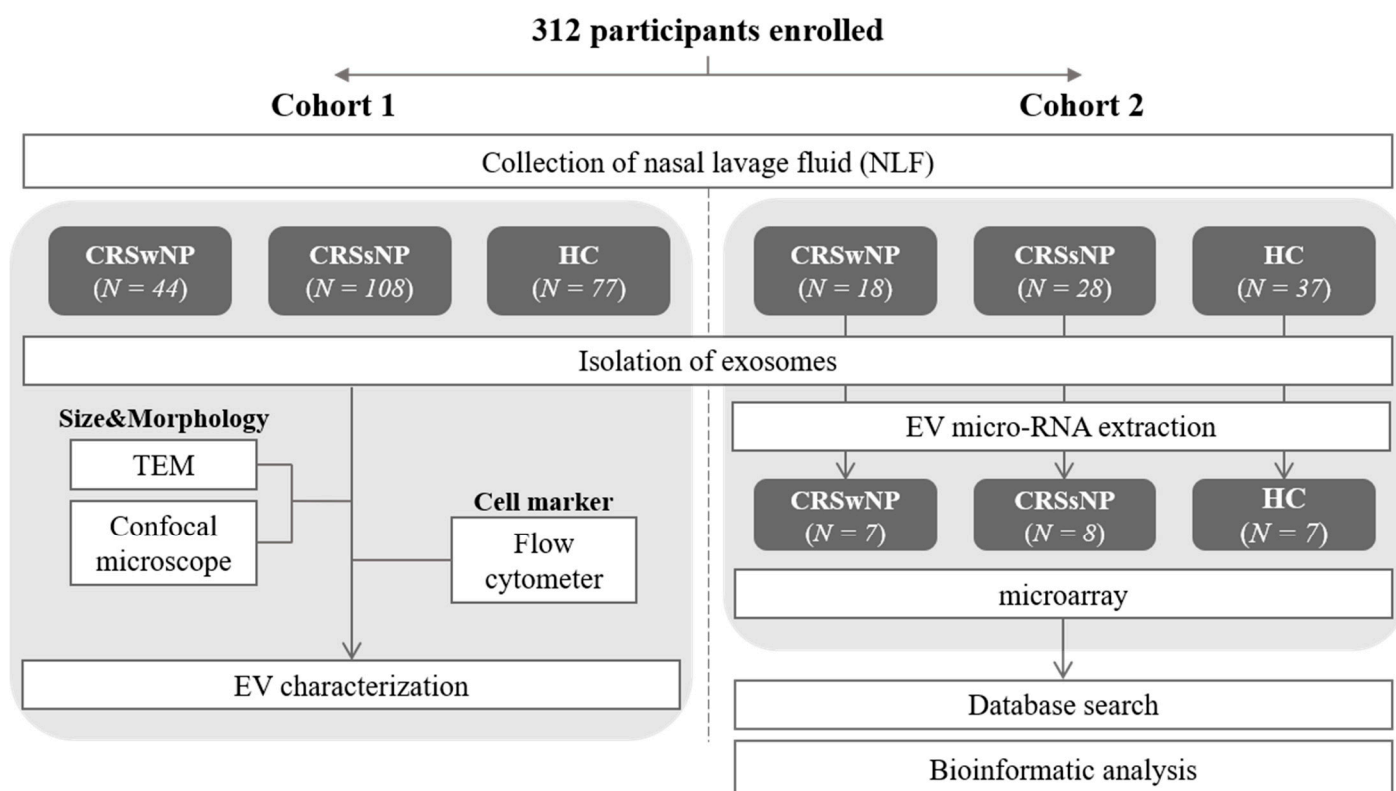

**Figure S1.** Study cohorts and participation: scheme of approach to include and analyze the study population.

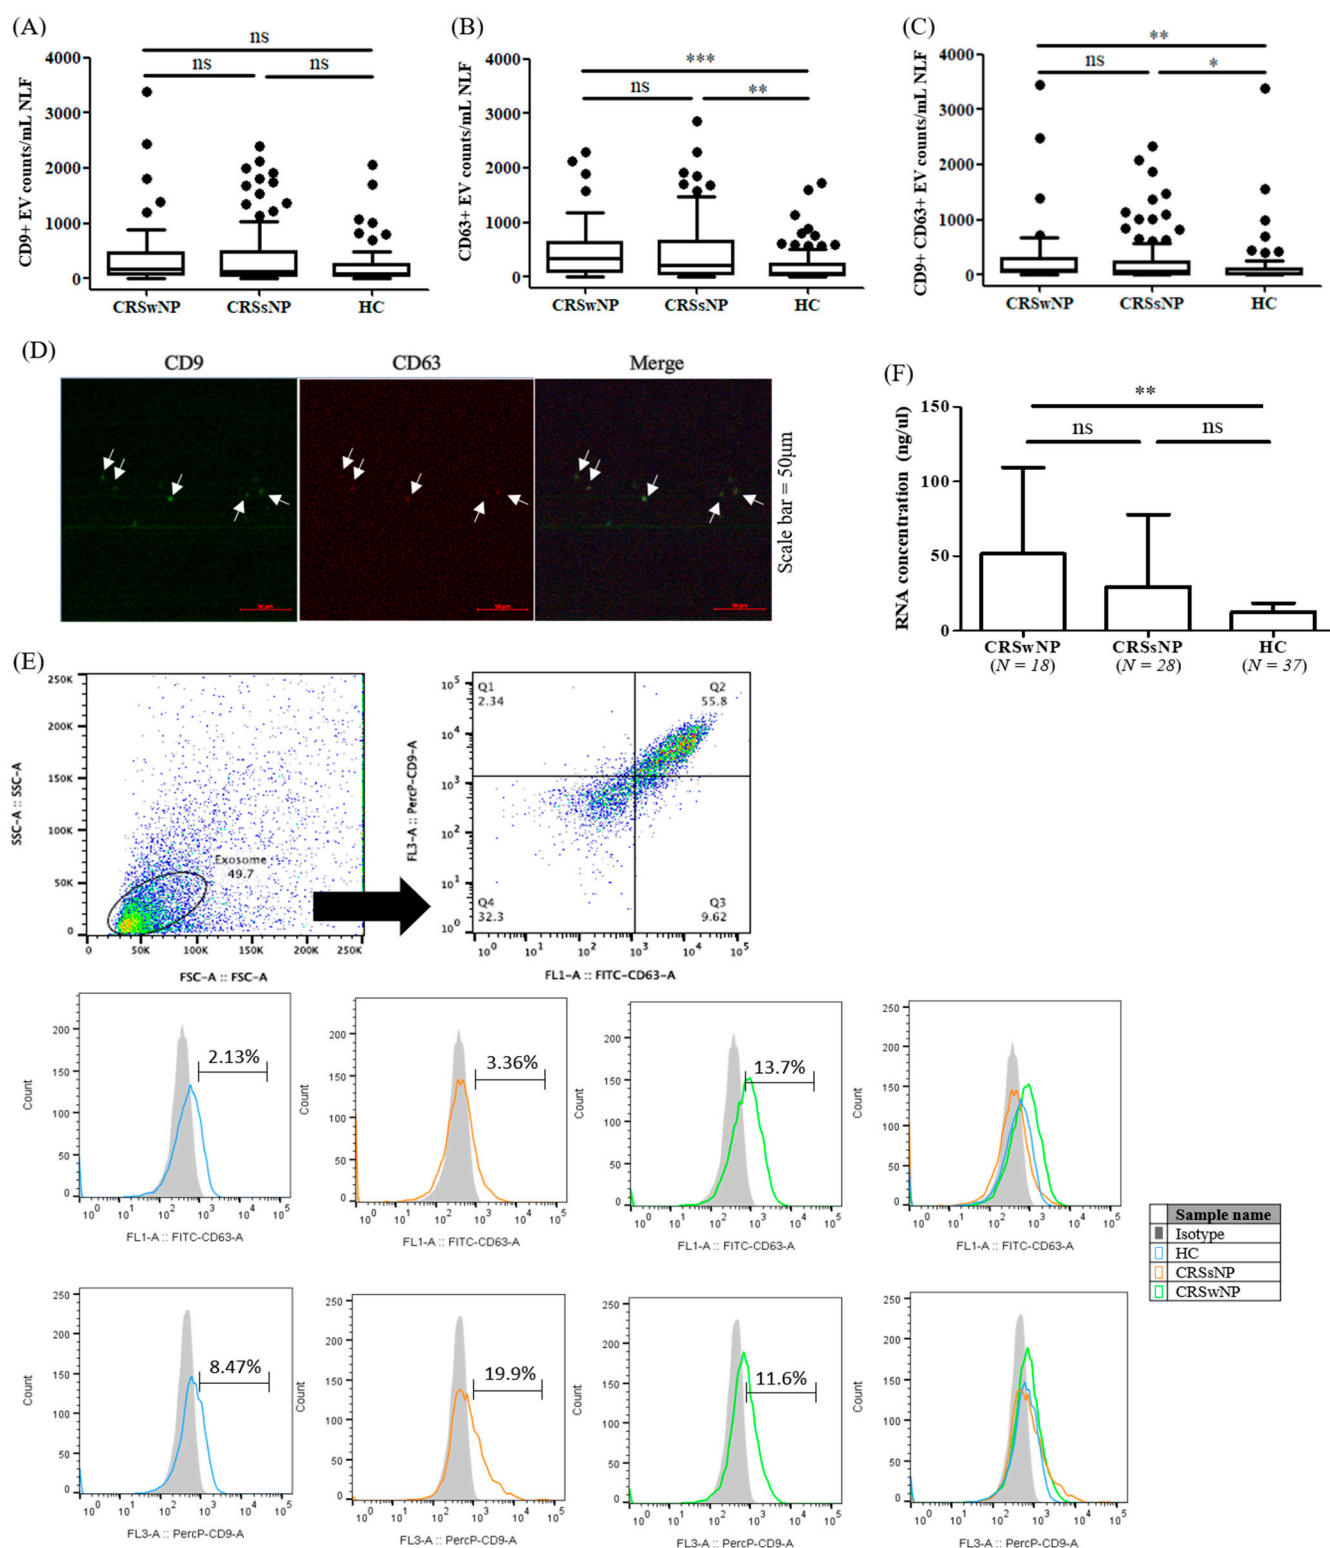

**Figure S2.** Phenotypic characterization of NLF EVs and concentration of total RNA in EVs. Phenotypic markers were analyzed by FCM, and distributions of **(A)** CD9+ EVs, **(B)** CD63+ EVs and **(C)** CD9+/CD63+ EVs were shown by patient group. **(D)** EVs were visualized using FITC-CD9 and PercP-CD63 markers by confocal microscopy and **(E)** FCM analysis of EVs displayed expression of FITC-CD9 and PercP-CD63 markers. **(F)** Total RNA concentration (ng/μL) in NLF-EVs by groups. 1-way ANOVA was used to evaluate statistical differences between groups. Levels of statistical significance are expressed as \*  $p < 0.05$ , \*\*  $p < 0.01$ , \*\*\*  $p < 0.005$  and ns  $> 0.05$ .
